# Supplementary material for: Highly controlled bifunctional Ag@rubrene core–shell nanostructures: surface-enhanced fluorescence and Raman scattering
Source: Royal Society of Chemistry journal article supplement (doi:10.1039/c3tc30521j), 2013-01-01
Supplement: c3tc30521j.pdf [file c3tc30521j.pdf]

# Highly Controlled Bifunctional Ag@Rubrene Core/Shell Nanostructures: Surface-enhanced Fluorescence and Raman Scattering

Cheng Wang,<sup>a</sup> Yun Kuang,<sup>a</sup> Liang Luo,<sup>\*a</sup> and Xiaoming Sun<sup>a</sup>

<sup>a</sup> State Key Laboratory of Chemical Resource Engineering, P.O. Box 98, Beijing  
University of Chemical Technology, Beijing 100029, P. R. China

\* Corresponding authors: luoliang@mail.buct.edu.cn

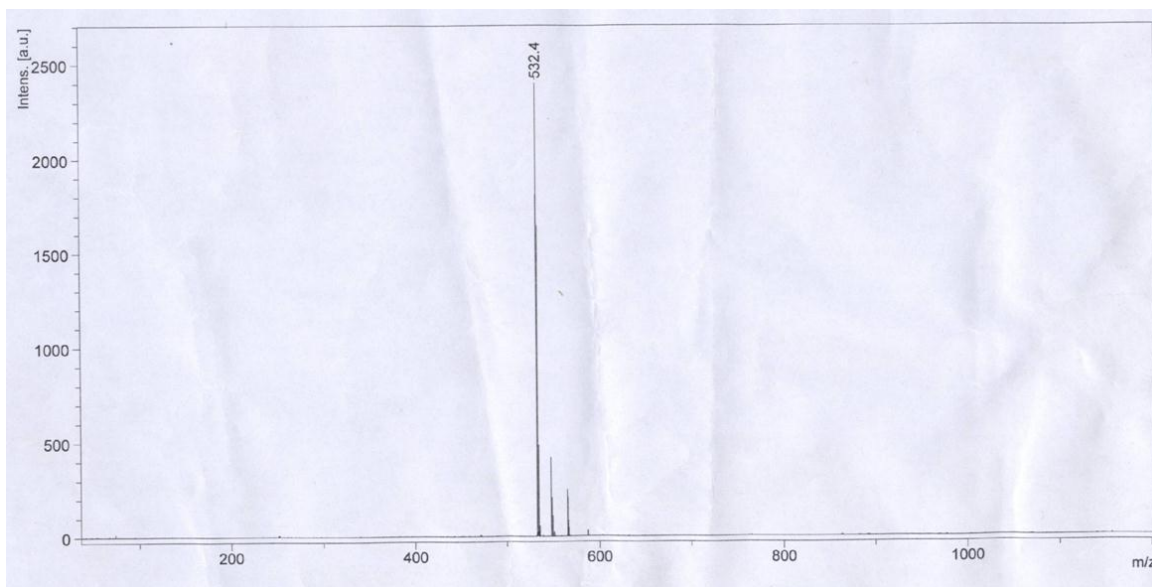

**Figure S1.** The mass spectrum of shell material re-dissolved from as-prepared nanostructures: the peak at  $m/z = 532$  corresponds to rubrene.

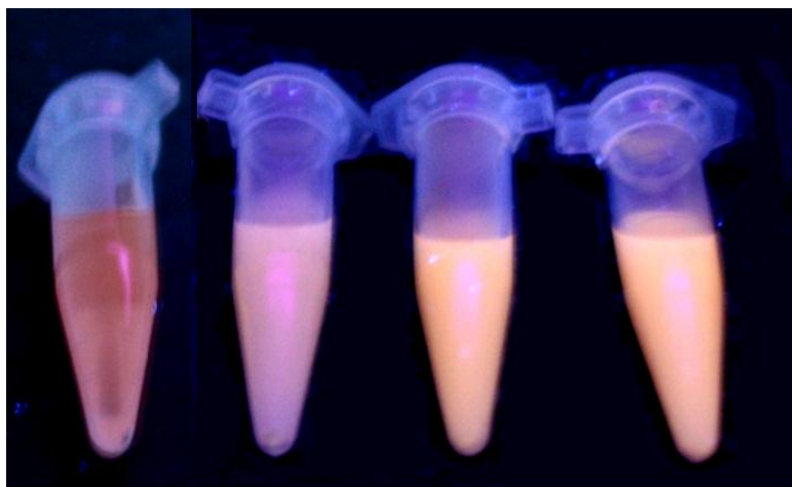

**Figure S2.** Digital camera images of suspensions under UV light from left to right: pristine rubrene nanoparticles and Ag@rubrene nanoparticles of three typical shell thickness: 4, 8 and 12 nm, respectively.

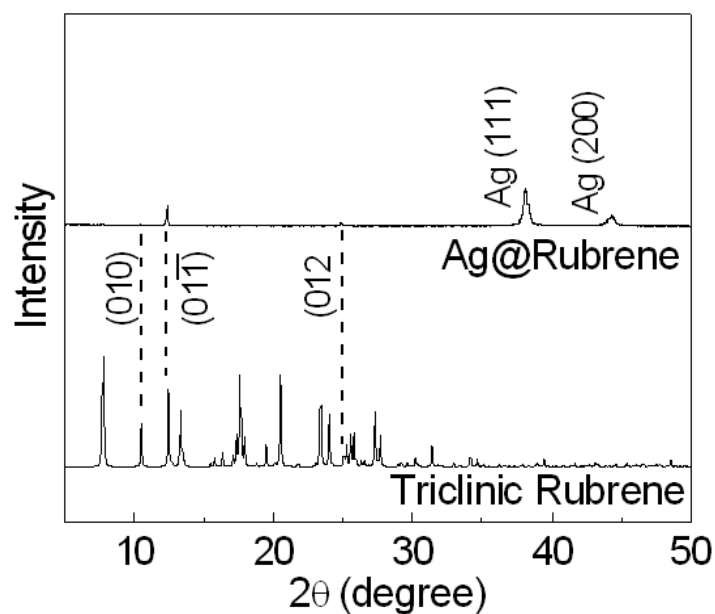

**Figure S3.** XRD patterns of as-prepared Ag@rubrene nanostructures and standard triclinic rubrene crystal.

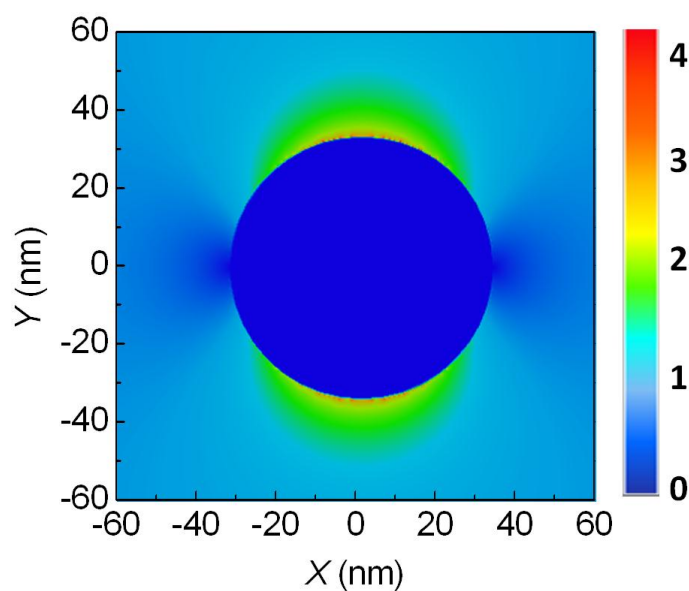

**Figure S4.** Electric-field amplitude ( $|E|$ ) patterns for a 65-nm Ag sphere at two polarizations and a 100-nm Ag sphere when irradiated at wavelength of 785 nm with the incident light along the  $z$  axis and electric field along the  $x$  axis. The incident field amplitude was assumed to be 1.
